# Supplementary material
Source: Springer Nature journal article supplement (https://www.springermedizin.de/resource/supplementary/13024_2010_176_MOESM7_ESM.pdf/9643590)

**A**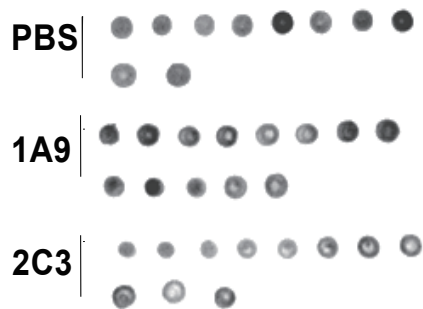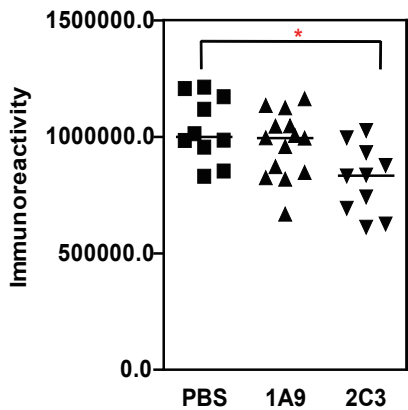**B**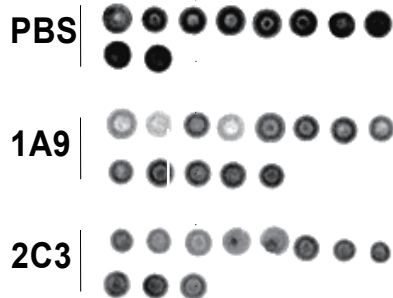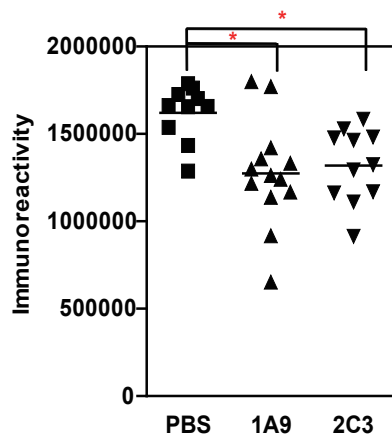**C**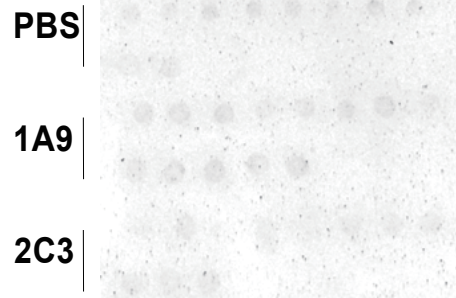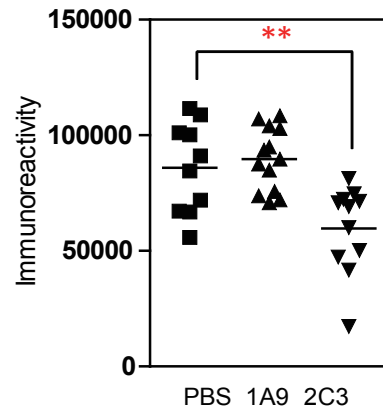**D**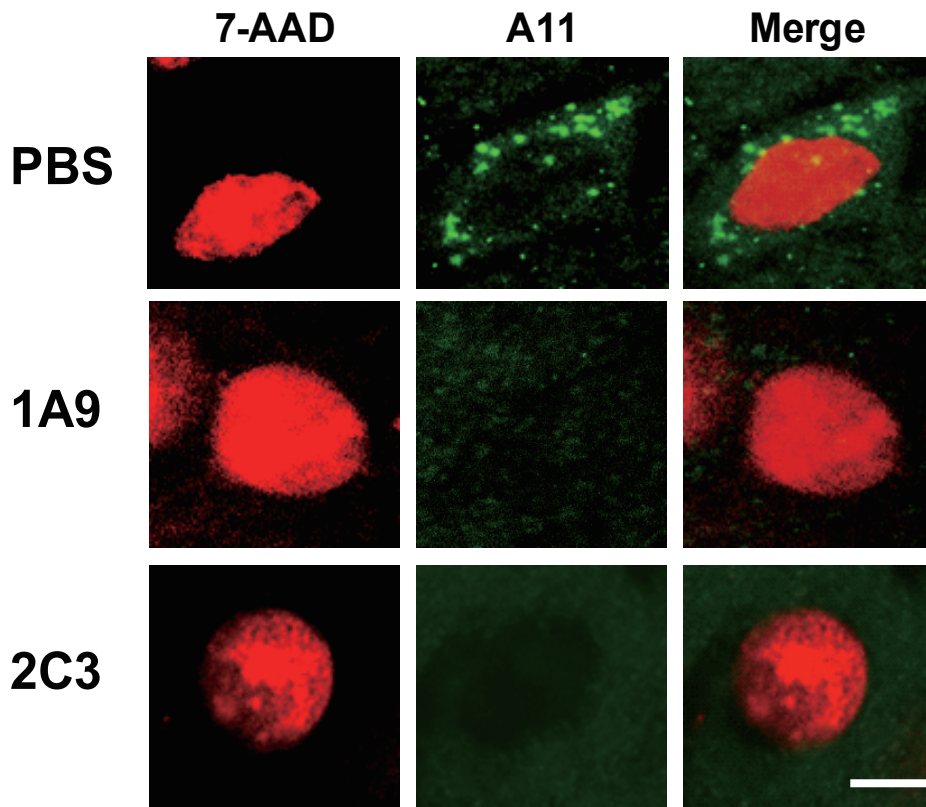

Supplement: MOESM7 [file 9643590]
